# Supplementary material for: A Cross-Sectional Study of Commercial Ewe Management Practices for Different Sheep Breeds across Southern Australia
Source: MDPI journal article supplement (doi:10.3390/ani13030388), 2023-01-23
Supplement: s1 [file s1]

**Table S1.** Total reproductive ewe flock numbers (no.) by breed and mating management practices of southern Australian sheep producers. Responses are recorded as counts (*n*) and overall percentage (%; to the closest integer) of respondents. A dash ('-') indicates no data.

| Category                                  | Breed         |              |            |              | Overall % |
|-------------------------------------------|---------------|--------------|------------|--------------|-----------|
|                                           | Composite (%) | Maternal (%) | Merino (%) | Shedding (%) |           |
| Total sheep no. ( <i>n</i> = 52)          |               |              |            |              |           |
| Up to 1000                                | 2             | 3            | 5          | -            | 19%       |
| 1001 to 2000                              | 2             | 2            | 5          | 2            | 21%       |
| 2001 to 3000                              | 3             | 2            | 3          | 2            | 19%       |
| 3001 to 4000                              | 2             | 1            | 5          | -            | 15%       |
| 4001 to 6000                              | 2             | 2            | 4          | -            | 15%       |
| 6001 and above                            | 5             | -            | -          | -            | 10%       |
| Ewe replacement strategy ( <i>n</i> = 52) |               |              |            |              |           |
| Self-replace                              | 16            | 4            | 20         | 4            | 85%       |
| Purchase replacement ewes                 | -             | 6            | 1          | -            | 13%       |
| Both self-replace and purchase            | -             | -            | 1          | -            | 2%        |
| Maiden ewe mating month ( <i>n</i> = 50)  |               |              |            |              |           |
| Spring                                    | -             | -            | 7          | 1            | 16%       |
| Summer                                    | 7             | 7            | 8          | 1            | 46%       |
| Autumn                                    | 9             | 2            | 6          | 2            | 38%       |
| Maiden ewe mating length ( <i>n</i> = 52) |               |              |            |              |           |
| Under 5 weeks                             | 1             | 1            | -          | -            | 4%        |
| 5 to 7 weeks                              | 12            | 6            | 18         | 4            | 80%       |
| 7 to 10 weeks                             | 3             | 1            | 3          | -            | 14%       |
| Over 10 weeks                             | -             | 1            | -          | -            | 2%        |
| Teaser ram use ( <i>n</i> = 10)           | 5             | 3            | 2          | -            | 100%      |
| Hormone use ( <i>n</i> = 4)               | 2             | 1            | 1          | -            | 100%      |

## Supplementary material

**Table S2.** Management practices of southern Australian sheep by breed and mating season. Responses are recorded as counts (*n*) and overall percentage (%; to the closest integer) of respondents. A dash ('-') indicates no data.

| Management practice                         | Mating season       |                     |                     | Overall % |
|---------------------------------------------|---------------------|---------------------|---------------------|-----------|
|                                             | Spring ( <i>n</i> ) | Summer ( <i>n</i> ) | Autumn ( <i>n</i> ) |           |
| Flushing length (mature ewe, <i>n</i> = 30) |                     |                     |                     |           |
| Composite ( <i>n</i> = 8)                   |                     |                     |                     |           |
| Up to 2 weeks                               | -                   | 2                   | 2                   | 50%       |
| Up to 4 weeks                               | -                   | 3                   | -                   | 38%       |
| No routine                                  | -                   | 1                   | -                   | 13%       |
| Maternal ( <i>n</i> = 6)                    |                     |                     |                     |           |
| Up to 2 weeks                               | -                   | 1                   | -                   | 17%       |
| Up to 6 weeks                               | -                   | 2                   | -                   | 33%       |
| Up to 8 weeks                               | 1                   | 1                   | 1                   | 50%       |
| Merino ( <i>n</i> = 14)                     |                     |                     |                     |           |
| Up to 2 weeks                               | 2                   | 2                   | -                   | 29%       |
| Up to 4 weeks                               | -                   | 1                   | 3                   | 29%       |
| Up to 6 weeks                               | -                   | 1                   | 1                   | 14%       |
| Up to 8 weeks                               | 1                   | -                   | -                   | 7%        |
| 12 weeks or more                            | 1                   | -                   | 1                   | 14%       |
| No routine                                  | 1                   | -                   |                     | 7%        |
| Shedding ( <i>n</i> = 2)                    |                     |                     |                     |           |
| Up to 4 weeks                               | 1                   | -                   | 1                   | 100%      |
| Mature ewe mating length ( <i>n</i> = 52)   |                     |                     |                     |           |
| Composite ( <i>n</i> = 16)                  |                     |                     |                     |           |
| Under 5 weeks                               | -                   | 1                   | -                   | 6%        |
| 5 to 7 weeks                                | 1                   | 7                   | 7                   | 94%       |
| Maternal ( <i>n</i> = 10)                   |                     |                     |                     |           |
| Under 5 weeks                               | -                   | 1                   | -                   | 10%       |
| 5 to 7 weeks                                | 2                   | 4                   | 1                   | 70%       |
| Over 10 weeks                               | -                   | 1                   | 1                   | 20%       |
| Merino ( <i>n</i> = 22)                     |                     |                     |                     |           |
| 5 to 7 weeks                                | 5                   | 7                   | 7                   | 86%       |
| 7 to 10 weeks                               | 2                   | 1                   | -                   | 14%       |
| Shedding ( <i>n</i> = 4)                    |                     |                     |                     |           |
| 5 to 7 weeks                                | 2                   | -                   | 2                   | 100%      |
| Mature ewe shearing month ( <i>n</i> = 48)  |                     |                     |                     |           |
| Summer                                      | 4                   | 4                   | 7                   | 31%       |
| Autumn                                      | 1                   | 5                   | 2                   | 17%       |
| Winter                                      | 1                   | 2                   | 4                   | 15%       |
| Spring                                      | 3                   | 11                  | 3                   | 35%       |
| No routine                                  | 1                   | -                   | -                   | 2%        |

**Table S3.** Maiden ewe mating length of southern Australian sheep producers by breed and mating season. Responses are recorded as counts (*n*) and overall percentage (%; to the closest integer) of respondents. A dash ('-') indicates no data.

| Mating length ( <i>n</i> = 50) | Mating season       |                     |                     | Overall % |
|--------------------------------|---------------------|---------------------|---------------------|-----------|
|                                | Spring ( <i>n</i> ) | Summer ( <i>n</i> ) | Autumn ( <i>n</i> ) |           |
| Composite ( <i>n</i> = 16)     |                     |                     |                     |           |
| Under 5 weeks                  | -                   | 1                   | -                   | 6%        |
| 5 to 7 weeks                   | -                   | 3                   | 9                   | 75%       |
| 7 to 10 weeks                  | -                   | 3                   | -                   | 19%       |
| Maternal ( <i>n</i> = 9)       |                     |                     |                     |           |
| Under 5 weeks                  | -                   | 1                   | -                   | 11%       |
| 5 to 7 weeks                   | -                   | 4                   | 2                   | 67%       |
| 7 to 10 weeks                  | -                   | 1                   | -                   | 11%       |
| Over 10 weeks                  | -                   | 1                   | -                   | 11%       |
| Merino ( <i>n</i> = 21)        |                     |                     |                     |           |
| 5 to 7 weeks                   | 5                   | 7                   | 6                   | 86%       |
| 7 to 10 weeks                  | 2                   | 1                   | -                   | 14%       |
| Shedding ( <i>n</i> = 2)       |                     |                     |                     |           |
| 5 to 7 weeks                   | 2                   | -                   | 2                   | 100%      |

**Table S4.** Feed sources used by southern Australian sheep producers when supplementary and/or containment feeding. Responses are reported as a percentage (%; to the closest integer) with count (*n*) in parentheses. Multiple feed sources were reported by some producers (total Response % exceeds 100).

| Feed source                        | Response % ( <i>n</i> ) |
|------------------------------------|-------------------------|
| Cereal grains                      |                         |
| Available grain                    | 9 (4)                   |
| Barley                             | 60 (26)                 |
| Corn                               | 5 (2)                   |
| Corn based pellets                 | 7 (3)                   |
| Oats                               | 23 (10)                 |
| Triticale                          | 2 (1)                   |
| Wheat                              | 5 (2)                   |
| Wheat based pellets                | 2 (1)                   |
| Legumes                            |                         |
| Available beans                    | 2 (1)                   |
| Faba beans ( <i>Vicia faba</i> L.) | 5 (2)                   |
| Lucerne                            | 5 (2)                   |
| Lupins                             | 19 (8)                  |
| Conserved forage                   |                         |
| Hay                                | 14 (6)                  |
| Silage                             | 7 (3)                   |
| Available supplement <sup>A</sup>  | 2 (1)                   |

<sup>A</sup> Available supplement is defined as using feed sources that are available at the time of supplementary feeding, having no specific preference.

**Table S5.** Lambing management practices of southern Australian sheep producers by breed. Responses are recorded as counts (*n*) and overall percentage (%; to the closest integer) of respondents. A dash ('-') indicates no data.

| Category                                                | Breed                     |                          |                        |                          | Overall % |
|---------------------------------------------------------|---------------------------|--------------------------|------------------------|--------------------------|-----------|
|                                                         | Composite<br>( <i>n</i> ) | Maternal<br>( <i>n</i> ) | Merino<br>( <i>n</i> ) | Shedding<br>( <i>n</i> ) |           |
| Mature ewes                                             |                           |                          |                        |                          |           |
| Single flock size at lambing ( <i>n</i> = 37)           |                           |                          |                        |                          |           |
| Up to 100                                               | 1                         | -                        | 2                      | -                        | 8%        |
| 101 to 200                                              | 1                         | 1                        | 4                      | -                        | 16%       |
| 201 to 400                                              | 5                         | 6                        | 6                      | 1                        | 49%       |
| 500 to over 1000                                        | -                         | 1                        | 2                      | -                        | 8%        |
| DSE basis <sup>A</sup>                                  | 1                         | -                        | 1                      | -                        | 5%        |
| Single flock                                            | 4                         | -                        | 1                      | -                        | 14%       |
| Multiple/twin flock size at lambing<br>( <i>n</i> = 37) |                           |                          |                        |                          |           |
| Up to 100                                               | 3                         | 5                        | 9                      | 1                        | 49%       |
| 101 to 200                                              | 4                         | 1                        | 3                      | -                        | 22%       |
| 201 to 400                                              | 3                         | 1                        | 3                      | -                        | 19%       |
| DSE basis                                               | 2                         | 1                        | 1                      | -                        | 11%       |
| Triple flock size at lambing ( <i>n</i> = 5)            |                           |                          |                        |                          |           |
| Up to 50                                                | 2                         | -                        | -                      | -                        | 40%       |
| 51 to 100                                               | 1                         | -                        | -                      | -                        | 20%       |
| 101 to 200                                              | 2                         | -                        | -                      | -                        | 40%       |
| Maiden ewes                                             |                           |                          |                        |                          |           |
| Flock management at lambing ( <i>n</i> = 9)             |                           |                          |                        |                          |           |
| Up to 200                                               | 1                         | 1                        | 1                      | -                        | 33%       |
| 201 and above                                           | 1                         | -                        | -                      | -                        | 11%       |
| Separate singles and twins                              | 2                         | -                        | 1                      | -                        | 33%       |
| Separate triplets                                       | 1                         | -                        | -                      | -                        | 11%       |
| Lower DSE                                               | 1                         | -                        | -                      | -                        | 11%       |

<sup>A</sup> DSE = Dry Sheep Equivalent, a 50 kg dry sheep
